# Supplementary material
Source: ML conference proceedings conference paper supplement (https://openreview.net/forum?id=sVsqvF7ZfvI)

$$\hat{d}f/n) \|\mathbf{r} + (\hat{d}f/\text{tr}[\mathbf{V}])\psi(\mathbf{r})\|^2/n + (\hat{d}f/\text{tr}[\mathbf{V}])^2 \|\psi(\mathbf{r})\|^2/n + 2(\hat{d}f/n) \|\mathbf{r}\|^2/n - \|\boldsymbol{\varepsilon}\|^2/n$$

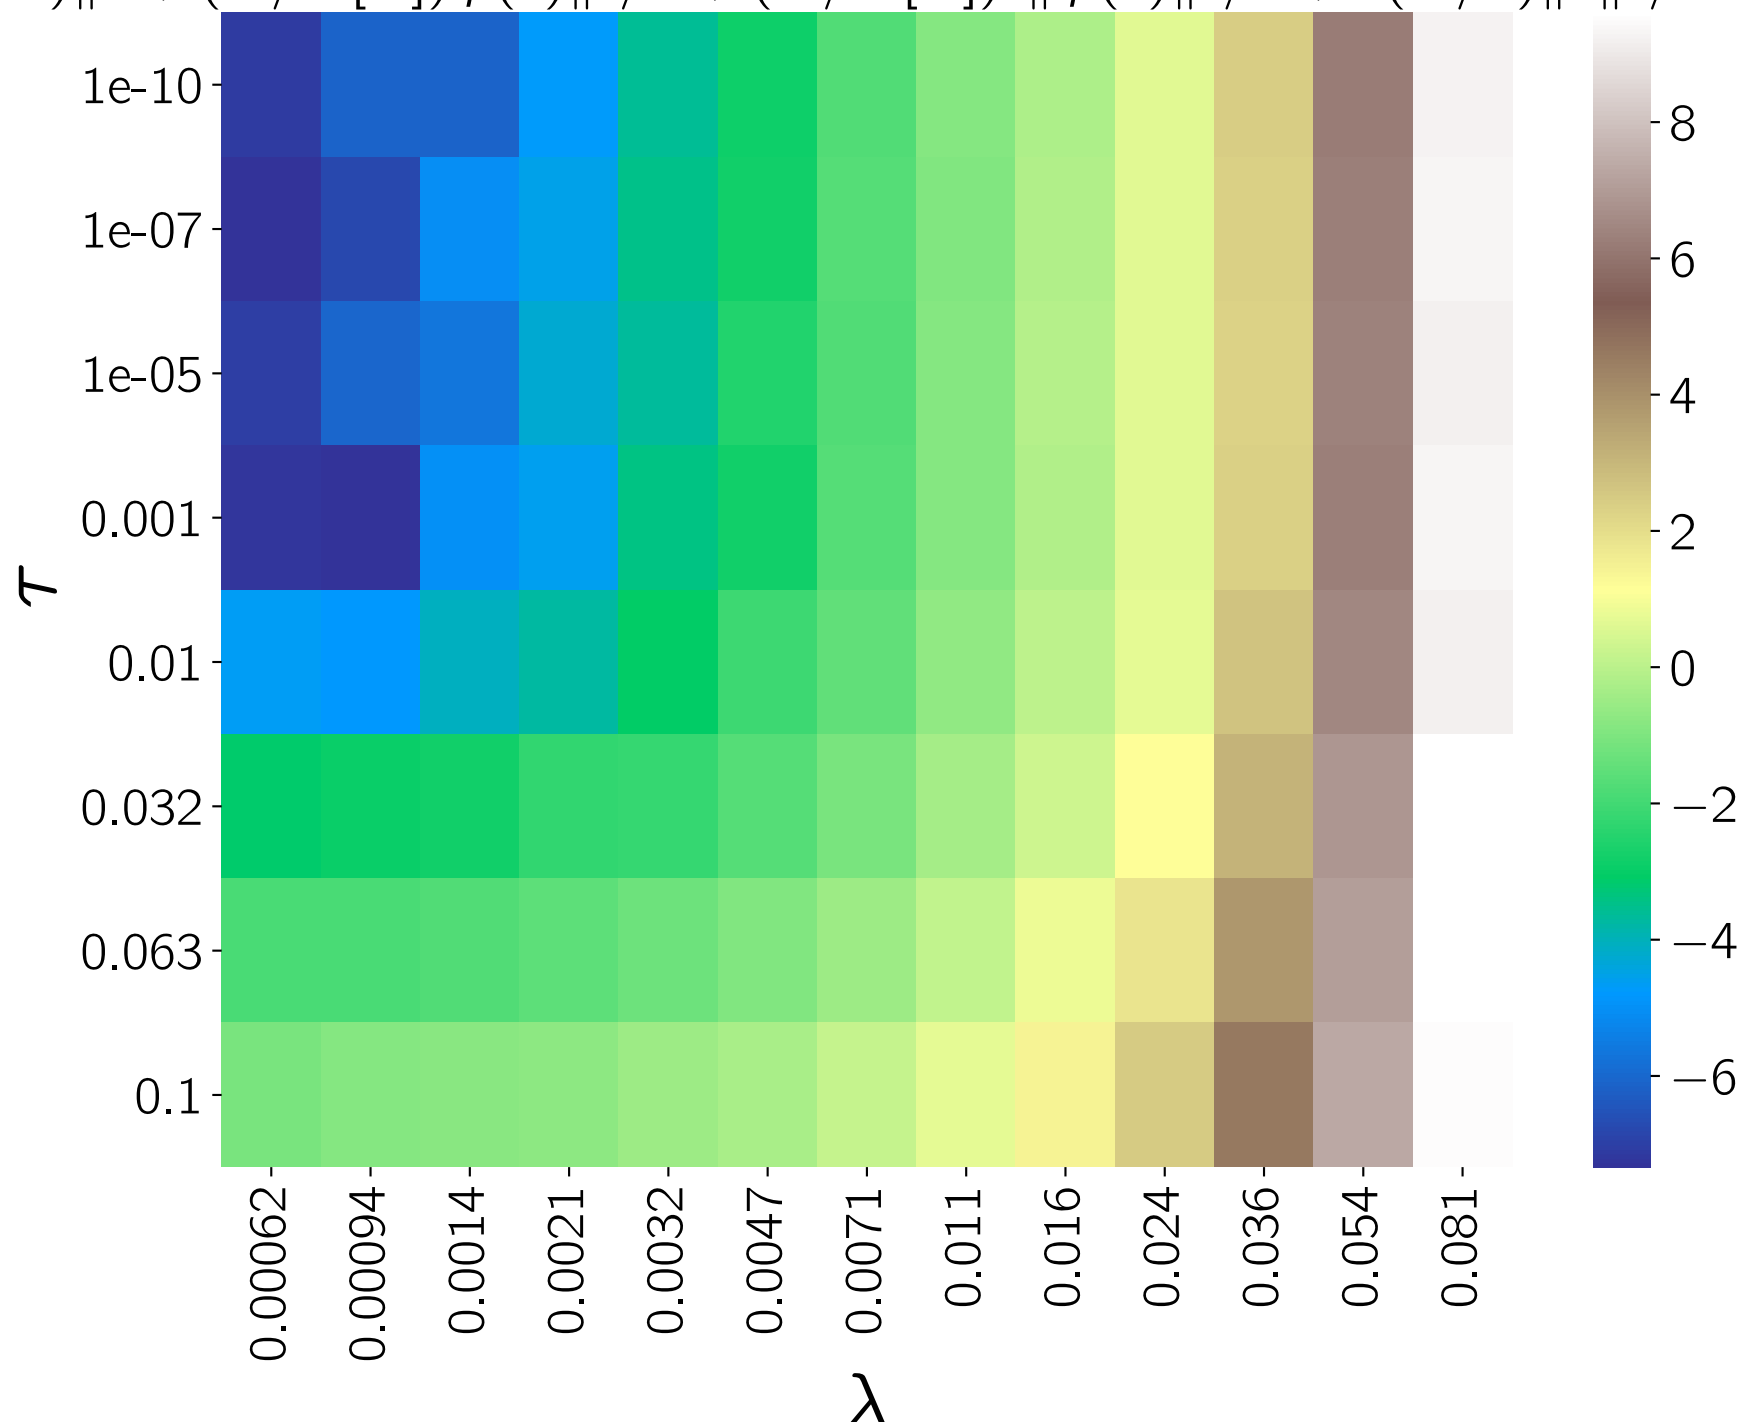

Supplement: supplementary_material [file attachment]
